# Supplementary material for: Prospective observational study and serosurvey of SARS-CoV-2 infection in asymptomatic healthcare workers at a Canadian tertiary care center
Source: PubMed Central journal article supplement (PMC7886177; doi:10.1371/journal.pone.0247258), 2021-02-16

**S3 FIG:** Heatmap of the 39 antigen reactivities upregulated in COVID+ patients as determined by significance analysis of microarrays. The COVID+ samples (n=7) form a separate cluster from the pre-COVID samples (n=18) using a hierarchical clustering algorithm. Yellow indicates high reactivity, whereas blue indicates low reactivity.

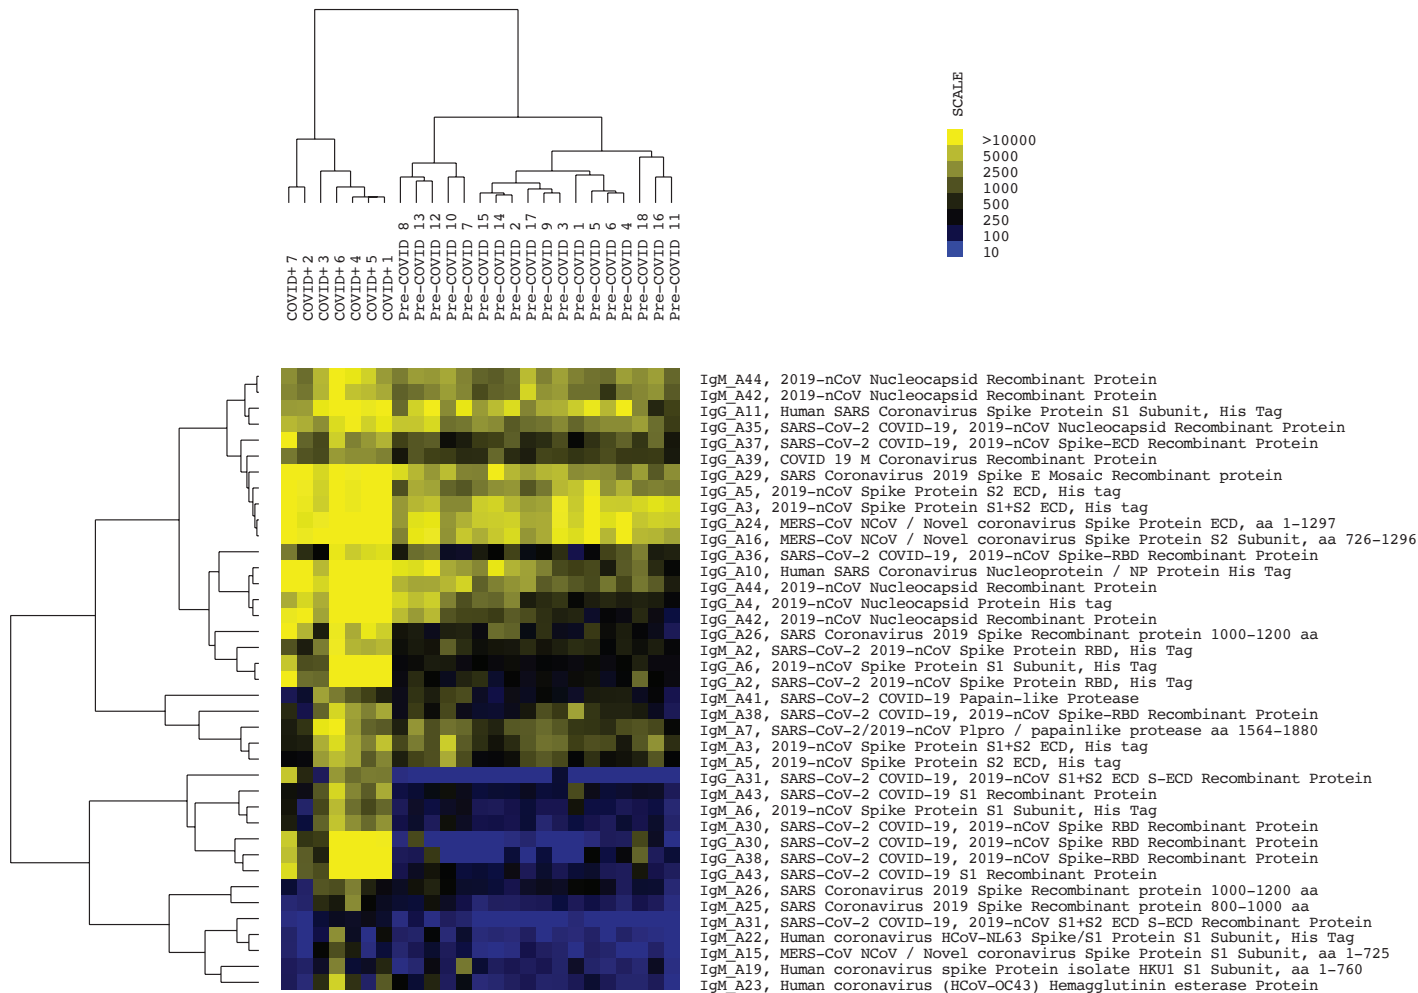

Supplement: pone.0247258.s003.pdf [file pone.0247258.s003.pdf]
